# Supplementary material
Source: publisher site journal article supplement (https://static.cambridge.org/content/id/urn:cambridge.org:id:article:S1047198700010354/resource/name/mpg004supp1.doc)
Supplement: Supplementary file 1 [file mpg004supp1.doc]

# Available on the Political Analysis Web Site

In Section 5.2, we discuss our replications of results presented by Robert Huckfeldt, Jeffrey Levine, William Morgan, and John Sprague (1999) that we do not present in the text of our paper. These replications, along with an example of CASES programming of active and latent timers, are presented below.

| **Appendix Table A**  **Replication of Huckfeldt et al. (1999) Table 1, Column 2.**  **Effect of Ideology on Issue Opinions, Contingent on Accessibility of Ideology,**  **Controlling for Baseline Speed of Response** | | | | |
| --- | --- | --- | --- | --- |
|  | Support for  Ideologically Relevant Issues | | | |
|  | | | | |
|  | Active Timer  Model | | Latent Timer  Model | |
|  |  | |  |  |
| Constant | 14.64  (.34) | ** | 21.04  (7.71) | ** |
| Ideology | -.87  (.08) | ** | -.88  (.08) | ** |
| Baseline Speed | -.26  (.41) |  | -.19  (.41) |  |
| Interviewer Control |  |  | -.88  (1.08) |  |
| Ideological Response Time | 1.44  (.41) | ** | 1.02  (.41) | ** |
| Baseline Speed X Ideology | .03  (.10) |  | .02  (.10) |  |
| Ideology Response Time X Ideology | -.36  (.10) | ** | -.26  (.10) | ** |
|  | | | | |
| N | 1502 |  | 1582 |  |
| Note. Source: 1996-1997 Political Network Election Study. OLS Models. Standard Errors in parentheses. * p < .05; ** p< .01 | | | | |

| **Appendix Table B**  **Replication of Huckfeldt et al. (1999) Table 3.**  **Persuadability as a Function of Ideology, Contingent on Accessibility,**  **Controlling for Baseline Speed of Response, Knowledge, and Interest** | | | | | |
| --- | --- | --- | --- | --- | --- |
|  | | | | | |
|  | Active Timer Model | | | Latent Timer Model | |
|  | | | | | |
| Constant | | 1.01  (.14) | ** | .85  (1.73) |  |
| Ideology | | .02  (.03) |  | .01  (.03) |  |
| Baseline Speed | | -.03  (.09) |  | .03  (.09) |  |
| Interviewer Control | |  |  | .03  (.24) |  |
| Ideological Response Time | | -.18  (.09) | * | -.31  (.09) | ** |
| Political Knowledge | | .09  (.05) |  | .11  (.04) | ** |
| Interest | | -.10  (.06) |  | -.08  (.06) |  |
| Baseline Speed X Ideology | | .02  (.02) |  | .01  (.02) |  |
| Political Knowledge X Ideology | | .02  (.01) |  | .01  (.01) |  |
| Interest X Ideology | | .04  (.02) | ** | .04  (.02) | ** |
| Ideological Response Time X Ideology | | .05  (.02) | ** | .08  (.02) | ** |
|  | | | | | |
| N | | 1740 |  | 1831 |  |
| Note. Source: 1996-1997 Political Network Election Study. OLS Models. Standard Errors in parentheses. * p < .05; ** p< .01 | | | | | |

| **Appendix Table C**  **Replication of Huckfeldt et al. (1999) Table 4, Column 1**  **Political Party Identification, Ideological Identification, and Accessibility** | | | | | | | |
| --- | --- | --- | --- | --- | --- | --- | --- |
| Party Identification as a Function of Ideology | | | | | | | |
|  |  | | | | | | |
|  | Active Timer Model | | | Latent Timer Model | | | |
|  |  | | | | | | |
| Constant | .49  (.34) |  | | -.98  (3.95) | |  | |
| Ideology | .55  (.10) | ** | | .59  (.09) | | ** | |
| Baseline Speed | .23  (.20) |  | | .18  (.21) | |  | |
| Interviewer Control |  |  | | .19  (.55) | |  | |
| Ideology Response Time | -.61  (.20) | ** | | -.49  (.22) | | * | |
| Ideological Extremity | .22  (.13) |  | | .29  (.13) | | * | |
| Ideology X Baseline Speed | -.01  (.05) |  | | .00  (.05) | |  | |
| Ideology X Extremity | .00  (.03) |  | | -.02  (.03) | |  | |
| Ideology X Ideol. Response Time | .23  (.05) | ** | | .20  (.05) | | ** | |
|  |  | | | | | | |
| N | 1755 | |  | | 1846 | |  |
| Note. Source: 1996-1997 Political Network Election Study. OLS Models. Standard Errors in parentheses. * p < .05; ** p< .01 | | | | | | | |

| **Appendix Table D**  **Replication of Huckfeldt et al. (1999) Table 4, Column 2**  **Political Party Identification, Ideological Identification, and Accessibility** | | | | |
| --- | --- | --- | --- | --- |
| Ideology as a Function of Party Identification | | | | |
|  | | |  | |
|  | Active Timer Model | | Latent Timer Model | |
|  | | |  | |
| Constant | 1.97  (.28) | ** | 1.03  (3.18) |  |
| Party ID | .43  (.09) | ** | .48  (.08) | ** |
| Baseline Speed | -.14  (.12) |  | -.10  (.13) |  |
| Interviewer Control |  |  | .12  (.45) |  |
| Party Response Time | -.25  (.12) | * | -.44  (.13) | ** |
| Partisan Extremity | .22  (.10) | * | .29  (.10) | ** |
| Party I.D. X Baseline Speed | .03  (.03) |  | .02  (.03) |  |
| Party I.D. X Partisan Extremity | -.02  (.03) |  | -.04  (.03) |  |
| Party I.D. X Party Response Time | .07  (.03) | * | .10  (.03) | ** |
|  | | |  | |
| N | 1738 |  | 1849 |  |
| Note. Source: 1996-1997 Political Network Election Study. OLS Models. Standard Errors in parentheses. * p < .05; ** p< .01 | | | | |

| **Appendix Table E**  **Replication of Huckfeldt et al. (1999) Table 2**  **Effect of Partisanship on Evaluations of Politicians, Contingent on Accessibility of Partisanship, Controlling for Baseline Speed of Response** | | | | | | | | | | | | | | | | | | | | | | | | | | | | | | | | | | | | | | | | |
| --- | --- | --- | --- | --- | --- | --- | --- | --- | --- | --- | --- | --- | --- | --- | --- | --- | --- | --- | --- | --- | --- | --- | --- | --- | --- | --- | --- | --- | --- | --- | --- | --- | --- | --- | --- | --- | --- | --- | --- | --- |
|  | | Bill Clinton | | | | | | | | Bob Dole | | | | | | | | Al Gore | | | | | | | | Jack Kemp | | | | | | | | Newt Gingrich | | | | | | |
|  | | | | | | | | | | | | | | | | | | | | | | | | | | | | | | | | | | | | | | | | |
|  | | Active Timer  Model | | | | Latent Timer Model | | | | Active Timer Model | | | | Latent Timer Model | | | | Active Timer Model | | | | Latent Timer Model | | | | Active Timer  Model | | | | Latent Timer Model | | | | Active Timer  Model | | | | Latent Timer  Model | | |
| Constant | | 4.23 (.06) | | ** | | 7.71  (2.02) | | ** | | 2.00  (.06) | | ** | | 2.71  (2.00) | |  | | 3.93  (.09) | | ** | | 5.93  (2.59) | | * | | 2.23  (.09) | | ** | | 4.18  (2.57) | | ++ | | 1.41  (.07) | | ** | | 2.69  (2.10) | |  |
| Party Identification | | -.42  (.02) | | ** | | -.44  (.02) | | ** | | .30  (.20) | | ** | | .31  (.02) | | ** | | -.33  (.02) | | ** | | -.31  (.02) | | ** | | .22  (.02) | | ** | | .25  (.02) | | ** | | .30  (.02) | | ** | | .32  (.02) | | ** |
| Baseline Speed | | -.17  (.08) | | * | | -.20  (.08) | | ** | | -.03  (.08) | |  | | .02  (.08) | |  | | -.18  (.11) | |  | | -.24  (.11) | | * | | .09  (.11) | |  | | .07  (.11) | |  | | .08  (.11) | |  | | -.01  (.08) | |  |
| Interviewer Control | |  | |  | | -.49  (.29) | | ++ | |  | |  | | -.11  (.28) | |  | |  | |  | | -.29  (.37) | |  | |  | |  | | -.29  (.37) | |  | |  | |  | | -.19  (.30) | |  |
| Party Response Time | .22  (.08) | | ** | | .13  (.08) | | ++ | | -.32  (.08) | | ** | | -.22  (.08) | | ** | | .24  (.11) | | ** | | .30  (.11) | | ** | | -.27  (.11) | | ** | | -.06  (.11) | |  | | -.20  (.08) | | ** | | -.04  (.08) | |  | |
| Baseline Speed X  Party I.D. | .03  (.02) | |  | | .03  (.02) | | + | | -.02  (.02) | |  | | .08  (.02) | | * | | .04  (.03) | |  | | .04  (.03) | | + | | -.02  (.03) | |  | | -.01  (.03) | |  | | -.004  (.02) | |  | | -.01  (.02) | |  | |
| Party Response Time X Ideology | -.08  (.02) | | ** | | -.03  (.02) | | + | | .08  (.02) | | ** | | .08  (.02) | | ** | | -.08  (.03) | | ** | | -.07  (.03) | | ** | | .08  (.03) | | ** | | .01  (.03) | |  | | .07  (.02) | | ** | | .04  (.02) | | ++ | |
| N | 1825 | |  | | 1938 | |  | | 1973 | |  | | 1918 | |  | | 1063 | |  | | 1135 | |  | | 1009 | |  | | 1073 | |  | | 1769 | |  | | 1875 | |  | |
| Note. Source: 1996-1997 Political Network Election Study. OLS Models. Standard Errors in parentheses. + p < .15; ++ p < .10; * p < .05; ** p < .01 | | | | | | | | | | | | | | | | | | | | | | | | | | | | | | | | | | | | | | | | |

**Appendix Figure 1**

**CASES Programming for a Response Latency Measure of Party Identification with**

**Active and Latent Timers**

**SCREEN 1—Latent Timer Begins, Read Question then Active Timer Begins**

>d16t1< [store <1> in d16t1][start timer][bold]

[cyan]HIT ENTER AS SOON AS YOU FINISH READING THE LAST WORD OF THE QUESTION

(THIS WILL START THE TIMER).[n][bold]

Generally speaking, do you usually think of yourself as a Republican, Democrat, Independent, or what?

<1> START TIMER

**SCREEN 2—Stop Active Timer**

>d16t2<

[store <1> in d16t2][start timer2][bold]

<1> [cyan]HIT ENTER AS SOON AS THE RESPONDENT BEGINS TO ANSWER[n][bold]

**SCREEN 3—Enter Response**

>d16< [stop timer2] [record timer2 in time2d16][bold]

[cyan](INTERVIEWER: DO NOT REPEAT THE QUESTION UNLESS THE RESPONDENT ASKS YOU TO.)

(Generally speaking, do you usually think of yourself as a Republican, Democrat, Independent, or what?)[n][bold]

<1> DEMOCRAT

<2> REPUBLICAN

<3> OTHER (SPECIFY)[specify]

<4> INDEPENDENT

<8> REFUSED

<9> UNCERTAIN

**SCREEN 4—Latent Timer Stops, Validate Active Timer**

>valid2<[stop timer][record timer in timed16][bold]

[cyan]INTERVIEWER: CHOOSE THE APPROPRIATE OPTION BELOW

<1> I DID NOT NEED TO SKIP BACK, REREAD THE QUESTION, ETC.

<2> I HAD TO REREAD THE QUESTION TO THE RESPONDENT

<3> I HAD TO SKIP BACK

<4> RESPONDENT ANSWERED BEFORE I FINISHED READING THE QUESTION

<5> I STRUCK THE WRONG KEY OR WAITED TOO LONG TO START/STOP THE TIMER

<6> SOMETHING ELSE WENT WRONG[n]

Note: The CASES syntax for “timer” and “timed16” records the latent timer and the syntax for “timer2” and “time2d16” records the active timer. Items in ALL CAPS were not read to respondents.
